# Supplementary material for: RNA-Seq Analysis of Transcriptome and Glucosinolate Metabolism in Seeds and Sprouts of Broccoli (Brassica oleracea var. italic)
Source: PubMed Central journal article supplement (PMC3937326; doi:10.1371/journal.pone.0088804), 2014-02-27
Supplement: pone.0088804.s005.pdf [file pone.0088804.s005.pdf]

Table S1. Characterization of raw data and trimmed data.

| Sample          | Reads  | Raw Reads | Raw Data (bp) | Reads Len. (bp) |
|-----------------|--------|-----------|---------------|-----------------|
| Seeds           | R1     | 9754489   | 2448376739    | 251             |
|                 | R2     | 9754489   | 2448376739    |                 |
|                 | Paired | 9754489   | 4896753478    |                 |
| Cotyledon (3d)  | R1     | 7452864   | 1870668864    | 251             |
|                 | R2     | 7452864   | 1870668864    |                 |
|                 | Paired | 7452864   | 3741337728    |                 |
| Cotyledon (7d)  | R1     | 9205040   | 2310465040    | 251             |
|                 | R2     | 9205040   | 2310465040    |                 |
|                 | Paired | 9205040   | 4620930080    |                 |
| Cotyledon (11d) | R1     | 9891820   | 2482846820    | 251             |
|                 | R2     | 9891820   | 2482846820    |                 |
|                 | Paired | 9891820   | 4965693640    |                 |
| Euphylla (11d)  | R1     | 6248763   | 1568439513    | 251             |
|                 | R2     | 6248763   | 1568439513    |                 |
|                 | Paired | 6248763   | 3136879026    |                 |

| Sample          | Reads  | Trimed Reads | Trimed Data (bp) | Useful Reads % | Useful Data % |
|-----------------|--------|--------------|------------------|----------------|---------------|
| Seeds           | R1     | 8306466      | 1827922032       | 0. 851553167   | 0. 702920144  |
|                 | R2     | 8306466      | 1614104627       |                |               |
|                 | Paired | 8306466      | 3442026659       |                |               |
| Cotyledon (3d)  | R1     | 6685661      | 1457313581       | 0. 897059305   | 0. 741961895  |
|                 | R2     | 6685661      | 1318616449       |                |               |
|                 | Paired | 6685661      | 2775930030       |                |               |
| Cotyledon (7d)  | R1     | 8432659      | 1821956243       | 0. 916091511   | 0. 757531582  |
|                 | R2     | 8432659      | 1678544233       |                |               |
|                 | Paired | 8432659      | 3500500476       |                |               |
| Cotyledon (11d) | R1     | 8492069      | 1864708802       | 0. 858494089   | 0. 707426511  |
|                 | R2     | 8492069      | 1648154524       |                |               |
|                 | Paired | 8492069      | 3512863326       |                |               |
| Euphylla (11d)  | R1     | 5746413      | 1239294058       | 0. 919608089   | 0. 760055501  |
|                 | R2     | 5746413      | 1144908103       |                |               |
|                 | Paired | 5746413      | 2384202161       |                |               |
