# Supplementary material for: RNA-Seq Analysis of Transcriptome and Glucosinolate Metabolism in Seeds and Sprouts of Broccoli (Brassica oleracea var. italic)
Source: PubMed Central journal article supplement (PMC3937326; doi:10.1371/journal.pone.0088804), 2014-02-27
Supplement: pone.0088804.s006.pdf [file pone.0088804.s006.pdf]

Table S2. Transcription factor members of every family detected in the broccoli seeds and sprouts

| TF Family      | Members | TF Family       | Members |
|----------------|---------|-----------------|---------|
| AP2-EREBP      | 109     | C2C2-CO-like    | 12      |
| bHLH           | 99      | GRF             | 11      |
| MYB            | 84      | BES1            | 11      |
| HB             | 77      | HMG             | 10      |
| C3H            | 69      | TUB             | 9       |
| NAC            | 67      | RWP-RK          | 9       |
| C2H2           | 65      | Alfin-like      | 9       |
| bZIP           | 61      | Sigma70-like    | 7       |
| Orphans        | 59      | PLATZ           | 7       |
| MYB-related    | 56      | MBF1            | 7       |
| WRKY           | 54      | E2F-DP          | 7       |
| PHD            | 49      | CAMTA           | 7       |
| SNF2           | 37      | ARR-B           | 7       |
| CCAAT          | 37      | ARID            | 7       |
| G2-like        | 33      | TAZ             | 6       |
| SET            | 30      | SRS             | 6       |
| GNAT           | 30      | CPP             | 6       |
| C2C2-GATA      | 30      | C2C2-YABBY      | 6       |
| C2C2-Dof       | 30      | BBR/BPC         | 6       |
| GRAS           | 27      | SWI/SNF-SWI3    | 5       |
| AUX/IAA        | 26      | Pseudo_ARR-B    | 5       |
| Trihelix       | 24      | LIM             | 5       |
| MADS           | 23      | EIL             | 5       |
| mTERF          | 21      | DDT             | 5       |
| HSF            | 21      | DBP             | 5       |
| TRAF           | 20      | GeBP            | 4       |
| ABI3VP1        | 20      | VOZ             | 3       |
| TCP            | 18      | PBF-2-like      | 3       |
| LOB            | 16      | ULT             | 2       |
| Jumonji        | 15      | Rcd1-like       | 2       |
| FHA            | 15      | RB              | 2       |
| zf-HD          | 14      | MED7            | 2       |
| SWI/SNF-BAF60b | 14      | LUG             | 2       |
| ARF            | 14      | SOH1            | 1       |
| Tify           | 13      | LFY             | 1       |
| BSD            | 13      | IWS1            | 1       |
| SBP            | 12      | HRT             | 1       |
| OFP            | 12      | CSD             | 1       |
| FAR1           | 12      | Coactivator_p15 | 1       |
